# Supplementary material for: Three Zn(ii)-based MOFs for luminescence sensing of Fe3+ and Cr2O72− ions
Source: Royal Society of Chemistry journal article supplement (doi:10.1039/c7dt04659f), 2018-01-01
Supplement: c7dt04659f1.pdf [file c7dt04659f1.pdf]

## *Supporting information*

### **Three Zn(II)-based MOFs for luminescence sensing of Fe<sup>3+</sup> and Cr<sub>2</sub>O<sub>7</sub><sup>2-</sup> ions**

Zhi-Zun Xiao, Li-Juan Han, Zhong-Jie Wang and He-Gen Zheng\*

*State Key Laboratory of Coordination Chemistry, School of Chemistry and Chemical Engineering, Collaborative Innovation Center of Advanced Microstructures, Nanjing University, Nanjing 210093, P. R. China. E-mail: [zhenghg@nju.edu.cn](mailto:zhenghg@nju.edu.cn); Fax: (+86)25-83314502*

#### **Experimental section.**

**Materials and Methods:** Reagents and solvents employed were commercially available. IR spectra of the complexes were recorded on a Nicolet (Impact 410) spectrometer with KBr pellets (5 mg of the sample in 300 mg of KBr) in the range of 400-4000 cm<sup>-1</sup>. C, H and N elemental analyses were carried out with a Perkin Elmer 240C elemental analyzer. The as-synthesized complexes were characterized by thermo gravimetric analysis (TGA) on a Perkin Elmer thermo gravimetric analyzer Pyris 1 TGA up to 923 K using a heating rate of 10 K min<sup>-1</sup> under a N<sub>2</sub> atmosphere. Powder X-ray diffraction (PXRD) measurements were performed on a Bruker D8 Advance X-ray diffractometer using Cu-K  $\alpha$  radiation ( $\lambda=0.71073$  Å), and the X-ray tube was operated at 40 kV and 40 mA.

**X-ray crystallography.** Single crystals of compound 1, 2 and 3 were collected on a Bruker SMART APEX CCD diffractometer using graphite monochromated Mo K $\alpha$  radiation ( $\lambda = 0.71073$  Å) at 296 K. The crystal and refined data are collected in Table S1. Selective bond distances and angles are given in Table S2.

**Table S1.** Crystal data and structure refinement for Compound **1-3**

| Compound                                                      | <b>1</b>                                                         | <b>2</b>                                                         | <b>3</b>                                            |
|---------------------------------------------------------------|------------------------------------------------------------------|------------------------------------------------------------------|-----------------------------------------------------|
| Empirical formula                                             | C <sub>40</sub> H <sub>50</sub> N <sub>2</sub> O <sub>6</sub> Zn | C <sub>33</sub> H <sub>37</sub> N <sub>2</sub> O <sub>8</sub> Zn | C <sub>30</sub> H <sub>28</sub> NO <sub>7</sub> SZn |
| Formula weight                                                | 720.19                                                           | 655.01                                                           | 611.96                                              |
| Crystal system                                                | triclinic                                                        | monoclinic                                                       | monoclinic                                          |
| Space group                                                   | P-1                                                              | P2(1)/c                                                          | C2/c                                                |
| a / Å                                                         | 6.1957(6)                                                        | 9.2019(4)                                                        | 15.8925(14)                                         |
| b / Å                                                         | 15.4084(14)                                                      | 13.4743(6)                                                       | 20.4648(19)                                         |
| c / Å                                                         | 19.6221(19)                                                      | 25.3334(10)                                                      | 21.081(2)                                           |
| $\alpha$ / °                                                  | 98.194(2)                                                        | 90                                                               | 90                                                  |
| $\beta$ / °                                                   | 91.550(2)                                                        | 90.4121(11)                                                      | 106.8200(10)                                        |
| $\gamma$ / °                                                  | 100.009(2)                                                       | 90                                                               | 90                                                  |
| V / Å <sup>3</sup>                                            | 1823.3(3)                                                        | 3141.0(2)                                                        | 6563.1(11)                                          |
| Z                                                             | 2                                                                | 4                                                                | 8                                                   |
| D <sub>calcd</sub> / g cm <sup>-3</sup>                       | 1.312                                                            | 1.385                                                            | 1.239                                               |
| $\mu$ / mm <sup>-1</sup>                                      | 0.722                                                            | 0.836                                                            | 0.853                                               |
| F(000)                                                        | 764                                                              | 1372                                                             | 2536                                                |
| $\theta$ min-max / °                                          | 2.761 to 27.831                                                  | 2.207 to 27.733                                                  | 1.668 to 25.027                                     |
| Tot., uniq. Data                                              | 15316 / 8481                                                     | 27618 / 7221                                                     | 18403 / 5588                                        |
| R(int)                                                        | 0.0387                                                           | 0.0411                                                           | 0.0615                                              |
| Nref, Npar                                                    | 8481, 445                                                        | 7221, 419                                                        | 5588, 379                                           |
| R1, wR2 [I > 2 $\sigma$ (I)]                                  | 0.0588, 0.1537                                                   | 0.0352, 0.0883                                                   | 0.0475, 0.1173                                      |
| GOF on F2                                                     | 1.088                                                            | 1.028                                                            | 1.025                                               |
| Largest diff. peak and hole (e <sup>-</sup> Å <sup>-3</sup> ) | 1.935 and -0.798                                                 | 0.316 and -0.628                                                 | 0.291 and -0.459                                    |

$$R_1 = \Sigma ||F_o| - |F_c|| / \Sigma |F_o|; wR_2 = [\Sigma w(F_o^2 - F_c^2)^2 / \Sigma wF_o^4]^{1/2}$$

**Table S2.** Selected bond lengths (Å) and angles (°) for Compound **1**

|                 | <b>1</b>   |
|-----------------|------------|
| N(1)-Zn(1)      | 2.041(3)   |
| N(3)-Zn(1)      | 2.037(3)   |
| O(5)-Zn(1)      | 1.950(3)   |
| O(6)-Zn(1)      | 1.926(3)   |
| O(6)-Zn(1)-O(5) | 101.67(13) |
| O(6)-Zn(1)-N(3) | 117.87(13) |
| O(5)-Zn(1)-N(3) | 105.13(12) |
| O(6)-Zn(1)-N(1) | 106.48(12) |
| O(5)-Zn(1)-N(1) | 120.41(13) |
| N(3)-Zn(1)-N(1) | 106.06(12) |

Symmetry codes: for 1: #1 = -x+2, -y+1, -z+1; #2 = -x-1, -y, -z; #3 = -x, -y+2, -z+1; #4 = -x+2, -y+1, -z.

---

| <b>2</b>            |            |
|---------------------|------------|
| N(3)-Zn(1)          | 2.0099(15) |
| O(5)-Zn(1)#2        | 2.0499(15) |
| O(6)-Zn(1)#3        | 2.0593(13) |
| O(9)-Zn(1)#4        | 2.0414(14) |
| O(21)-Zn(1)         | 2.0276(13) |
| Zn(1)-Zn(1)#3       | 2.9008(4)  |
|                     |            |
| N(3)-Zn(1)-O(21)    | 103.17(6)  |
| N(3)-Zn(1)-O(9)#5   | 99.22(6)   |
| O(21)-Zn(1)-O(9)#5  | 87.54(6)   |
| N(3)-Zn(1)-O(5)#6   | 99.89(6)   |
| O(21)-Zn(1)-O(5)#6  | 89.40(6)   |
| O(9)#5-Zn(1)-O(5)#6 | 160.85(5)  |
| N(3)-Zn(1)-O(6)#3   | 95.88(6)   |
| O(21)-Zn(1)-O(6)#3  | 160.77(6)  |
| O(9)#5-Zn(1)-O(6)#3 | 86.84(6)   |
| O(5)#6-Zn(1)-O(6)#3 | 89.90(6)   |

---

Symmetry codes: for 1: #1 = -x, -y+1, -z+1 ; #2 = x, -y+1/2, z+1/2; #3 = -x+2, -y, -z+1;  
#4 = -x+2, y+1/2, -z+3/2; #5 = -x+2, y-1/2, -z+3/2; #6 = x, -y+1/2, z-1/2.

---

| <b>3</b>            |            |
|---------------------|------------|
| O(5)-Zn(1)#1        | 2.042(3)   |
| O(4)-Zn(1)#2        | 2.037(3)   |
| O(1)-Zn(1)          | 2.041(3)   |
| Zn(1)-N(1)          | 2.021(3)   |
| Zn(1)-N(1)          | 2.024(3)   |
| Zn(1)-O(7)#3        | 2.084(3)   |
| Zn(1)-Zn(1)#3       | 2.9912(8)  |
|                     |            |
| N(1)-Zn(1)-O(4)#2   | 101.15(12) |
| N(1)-Zn(1)-O(1)     | 107.30(12) |
| O(4)#2-Zn(1)-O(1)   | 88.82(12)  |
| N(1)-Zn(1)-O(5)#5   | 100.12(12) |
| O(4)#2-Zn(1)-O(5)#5 | 158.28(10) |
| O(1)-Zn(1)-O(5)#5   | 89.03(12)  |
| N(1)-Zn(1)-O(7)#3   | 94.25(12)  |
| O(4)#2-Zn(1)-O(7)#3 | 88.60(12)  |
| O(1)-Zn(1)-O(7)#3   | 158.39(12) |
| O(5)#5-Zn(1)-O(7)#3 | 85.48(12)  |

---

Symmetry codes: for 1: #1 =  $x+1/2, y+1/2, z$ ; #2 =  $-x+1, -y+1, -z+1$ ; #3 =  $-x+1/2, -y+1/2, -z+1$ ; #4 =  $-x+1, -y, -z+2$ ; #5 =  $x-1/2, y-1/2, z$ .

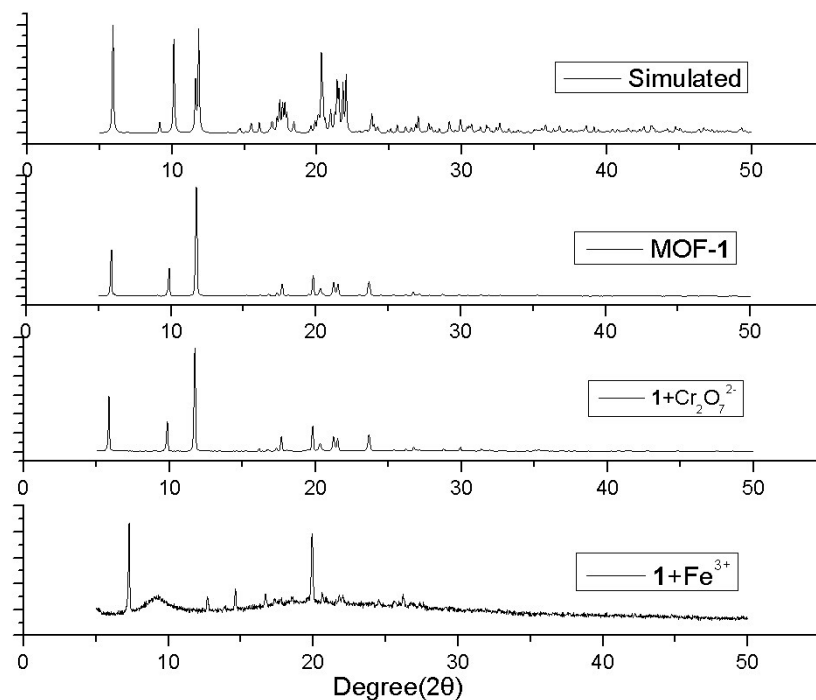

**Figure S1** PXRD of **1** before and after immersed in Cr<sub>2</sub>O<sub>7</sub><sup>2-</sup> / Fe<sup>3+</sup> for 10 hours.

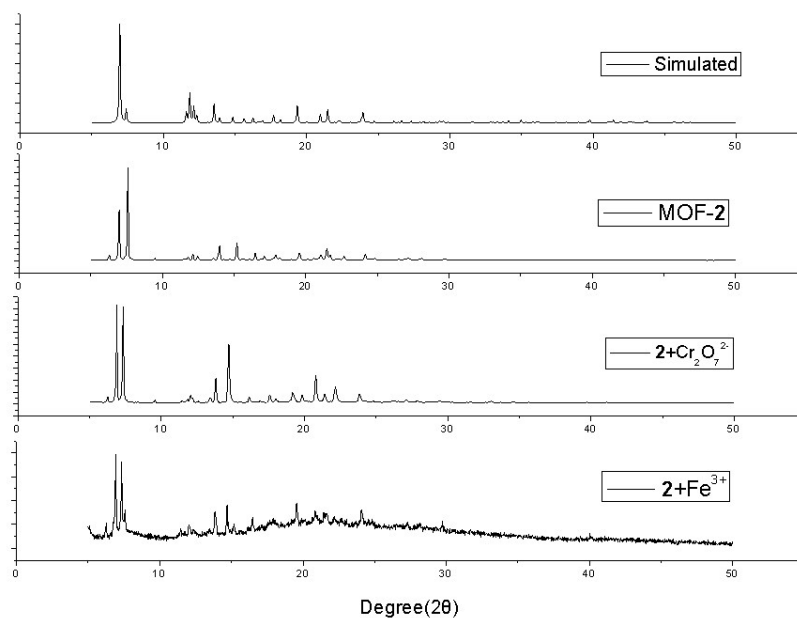

**Figure S2** PXRD of **2** before and after immersed in Cr<sub>2</sub>O<sub>7</sub><sup>2-</sup> / Fe<sup>3+</sup> for 10 hours.

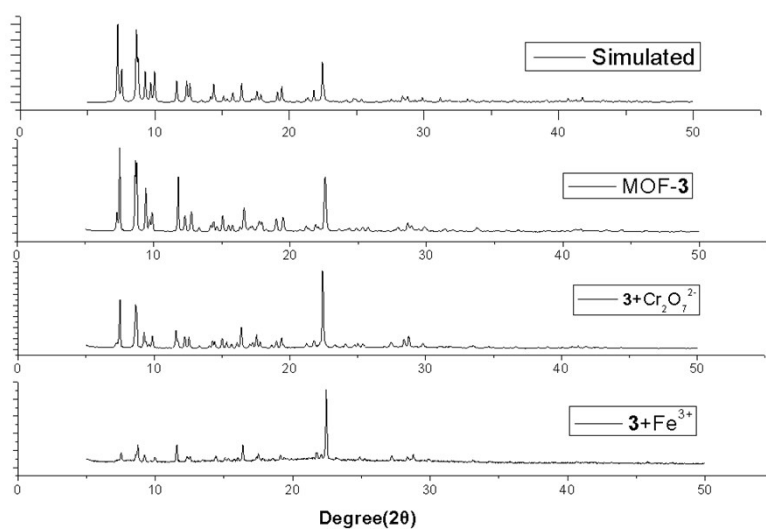

**Figure S3** PXRD of **3** before and after immersed in Cr<sub>2</sub>O<sub>7</sub><sup>2-</sup> / Fe<sup>3+</sup> for 10 hours.

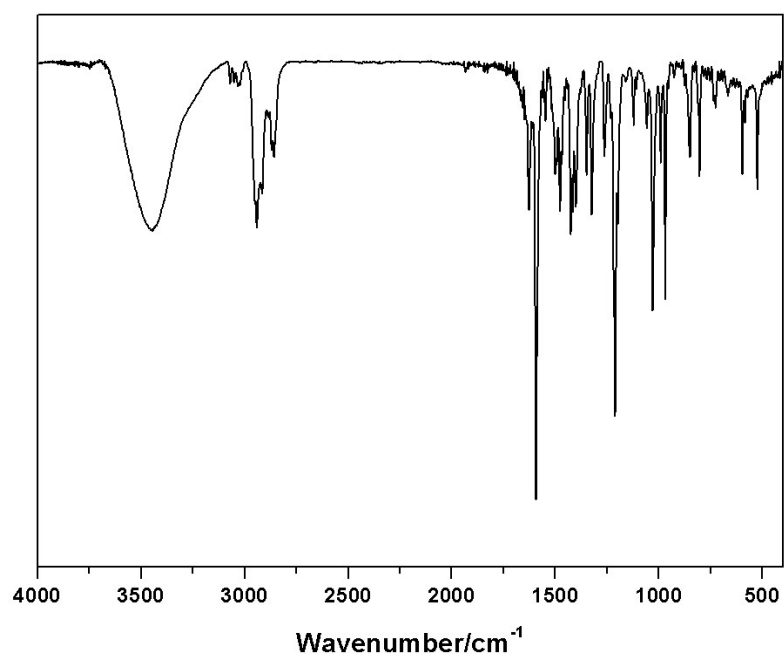

**Figure S4** IR spectra of H<sub>2</sub>L ligand.

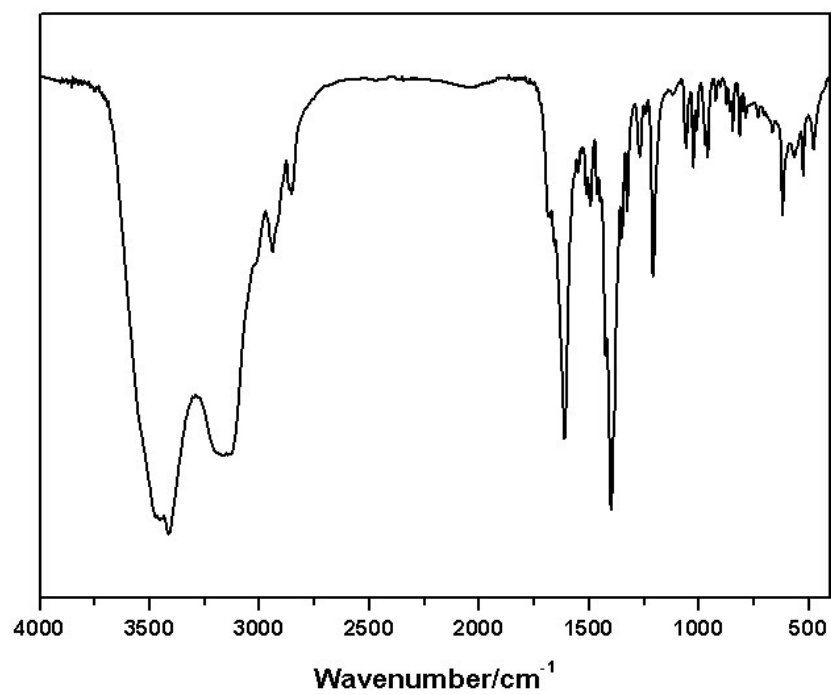

**Figure S5** IR spectra of compound 1.

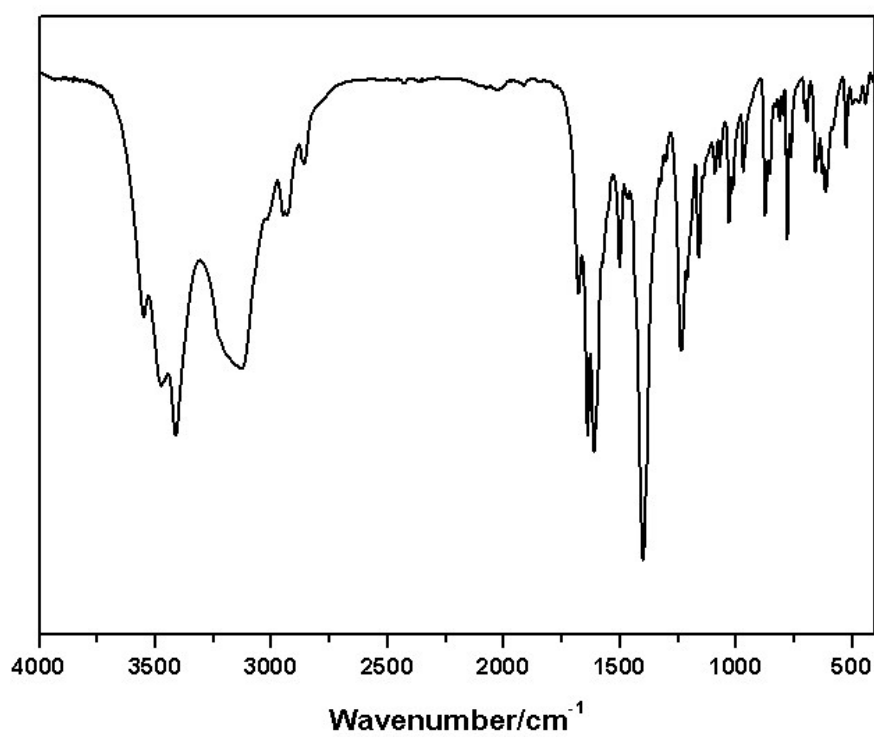

**Figure S6** IR spectra of compound 2.

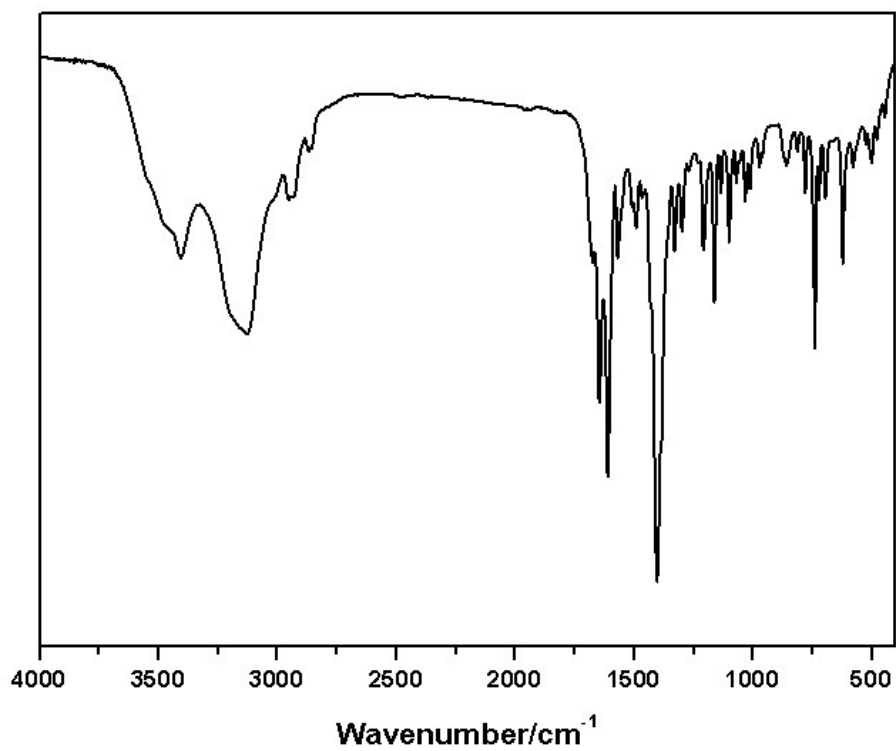

**Figure S7** IR spectra of compound **3**.

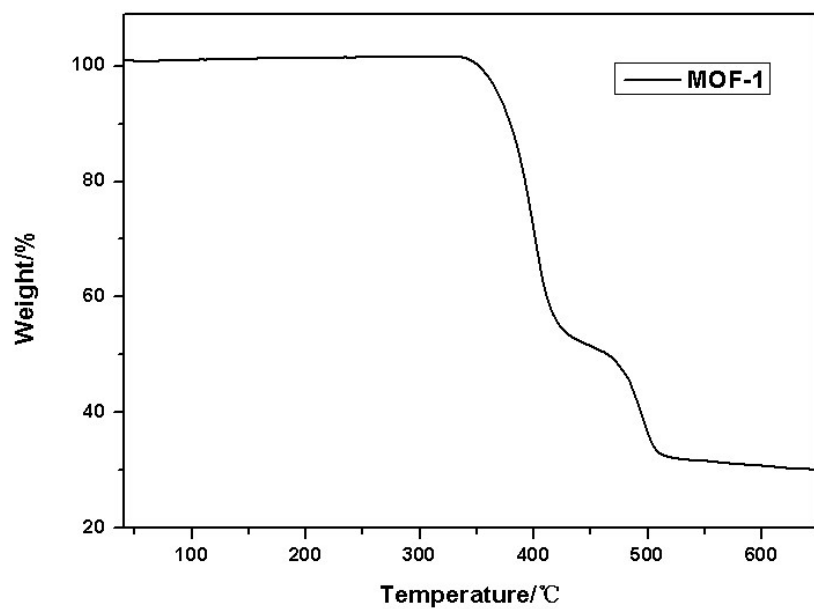

**Figure S8** The TGA diagrams of compound **1**.

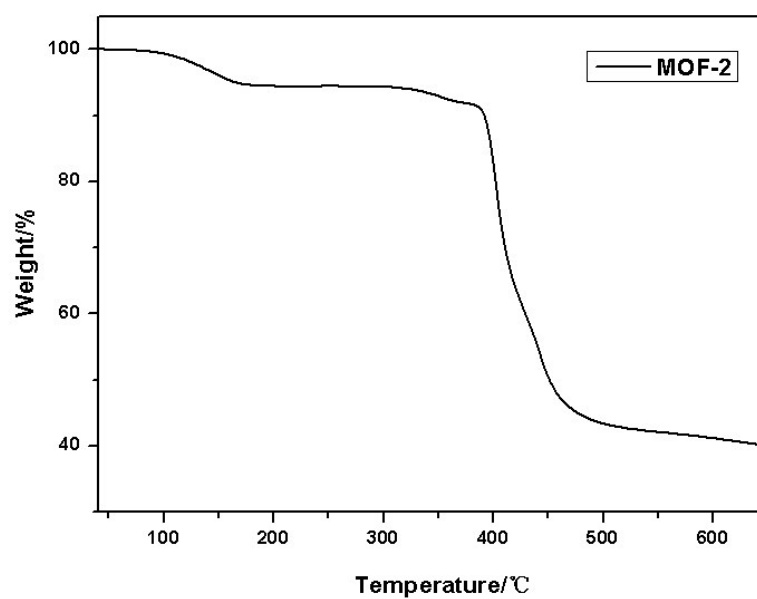

**Figure S9** The TGA diagrams of compound **2**.

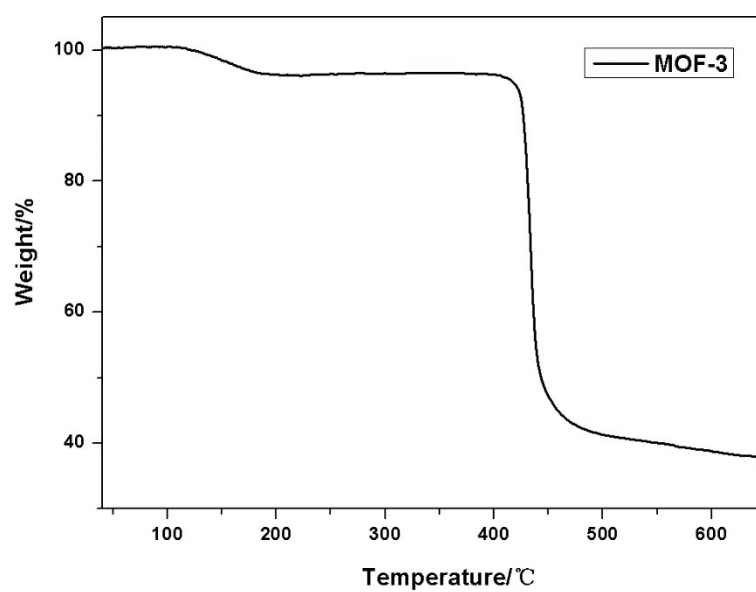

**Figure S10** The TGA diagrams of compound **3**.



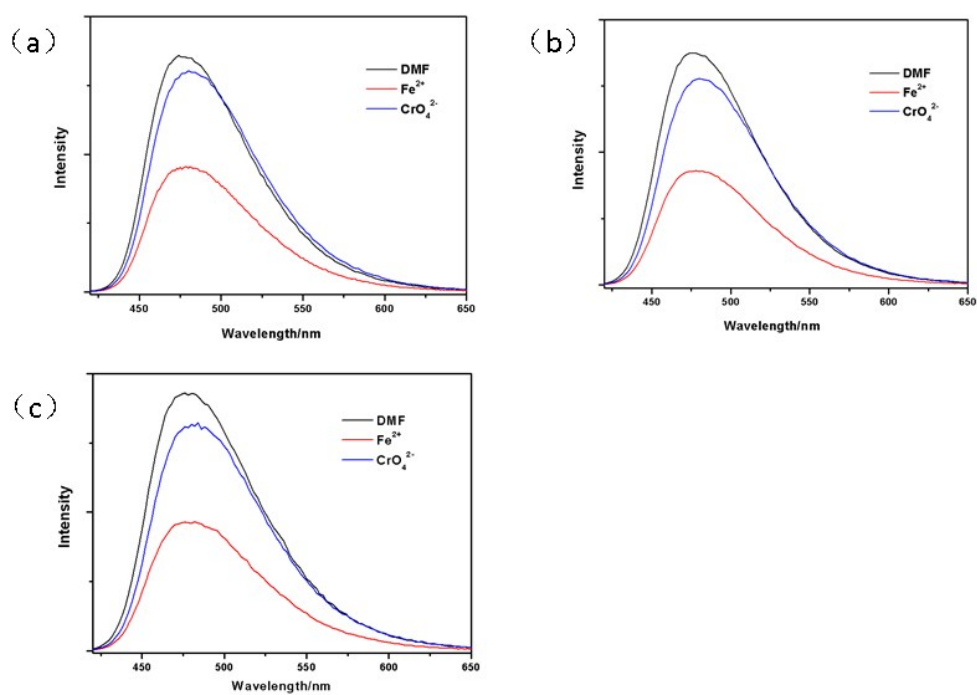

**Figure S11** (a) - (c) Fluorescence spectra of MOFs **1–3** (DMF suspension, 2.0 mL) added  $\text{FeSO}_4$  ( $5 \times 10^{-2}$  M, 50  $\mu\text{L}$ ) and  $\text{Na}_2\text{CrO}_4$  ( $5 \times 10^{-3}$  M, 100  $\mu\text{L}$ ).

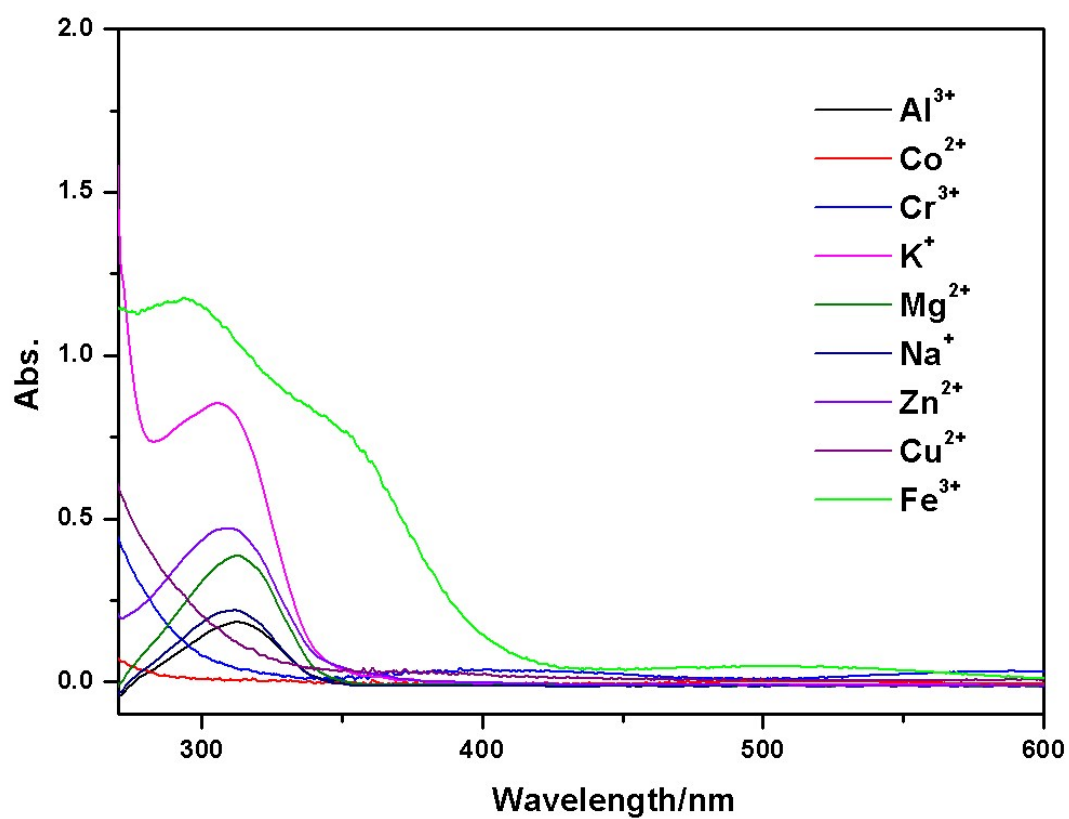

**Figure S12** Liquid UV-vis spectra of different metal cations in DMF.

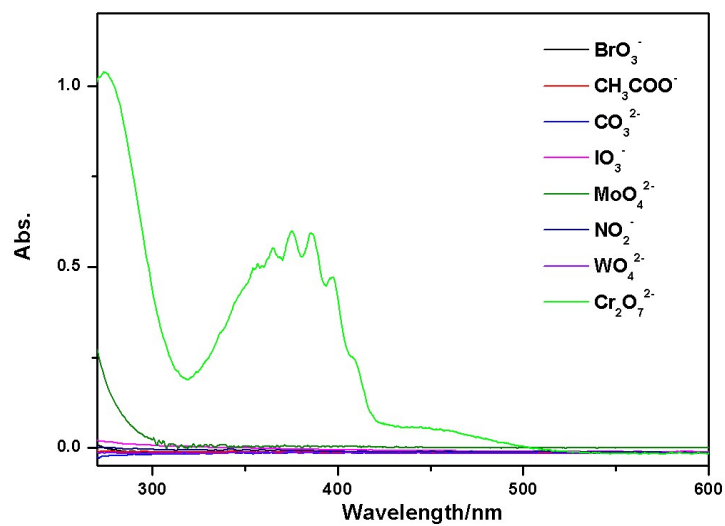

**Figure S13** Liquid UV-vis spectra of different inorganic anions in DMF.

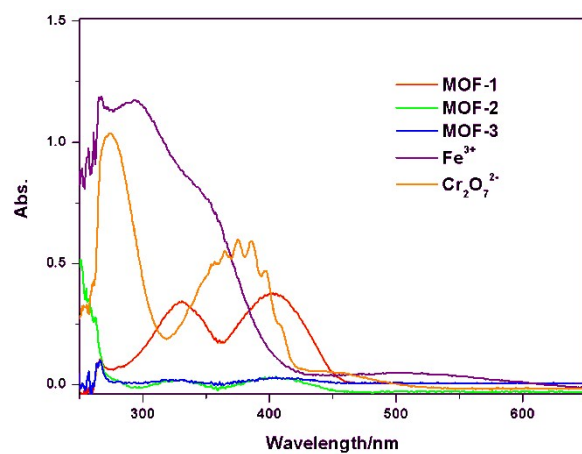

**Figure S14** Liquid UV-vis spectra of MOFs **1-3**, Fe<sup>3+</sup> and Cr<sub>2</sub>O<sub>7</sub><sup>2-</sup> in DMF.
